# Supplementary material for: Association between caffeine intake and fractional exhaled nitric oxide (FENO) in asthmatic children: NHANES 2007-2012
Source: Research Square preprint supplement (doi:10.21203/rs.3.rs-4022449/v1), 2024-04-10
Supplement: Supplementary file 1 [file 1e9ea703b4e827cc8c52dfcf.docx]

**Appendix Table 1.** Relative importance score of each variable on the FENO by the XGBoost algorithm

| **Feature** | **Gain** | **Cover** | **Frequency** |
| --- | --- | --- | --- |
| Vitamin C | 0.137026885 | 0.093145633 | 0.078998073 |
| Iron | 0.100947476 | 0.086805649 | 0.057161207 |
| Caffeine intake | 0.09553025 | 0.07566032 | 0.184971098 |
| Vitamin B12 | 0.094360451 | 0.100714987 | 0.080924855 |
| Vitamin D | 0.089224957 | 0.075714312 | 0.065082423 |
| BMI | 0.081125364 | 0.077429617 | 0.078355812 |
| Folate | 0.06866571 | 0.107831634 | 0.072789553 |
| Zinc | 0.061909784 | 0.066051704 | 0.053307643 |
| Income | 0.055081208 | 0.031540016 | 0.058659816 |
| Selenium | 0.053998936 | 0.078507394 | 0.057803468 |
| Vitamin K | 0.05349458 | 0.088425429 | 0.066152858 |
| Copper | 0.049239691 | 0.064396622 | 0.052665382 |
| Age | 0.037075289 | 0.021260645 | 0.0507386 |
| Education | 0.022319419 | 0.032516037 | 0.04238921 |
